# Supplementary material
Source: publisher site journal article supplement (https://www.dovepress.com/article/supplementary_file/567022/567022%20Supplementary%20material.docx)
Supplement: Supplementary file 1 [file 567022%20Supplementary%20material.docx]

**Supplementary Material for Manuscript 567022**

**Supplementary Figure 1. Change in serum serotonin levels between groups**

**
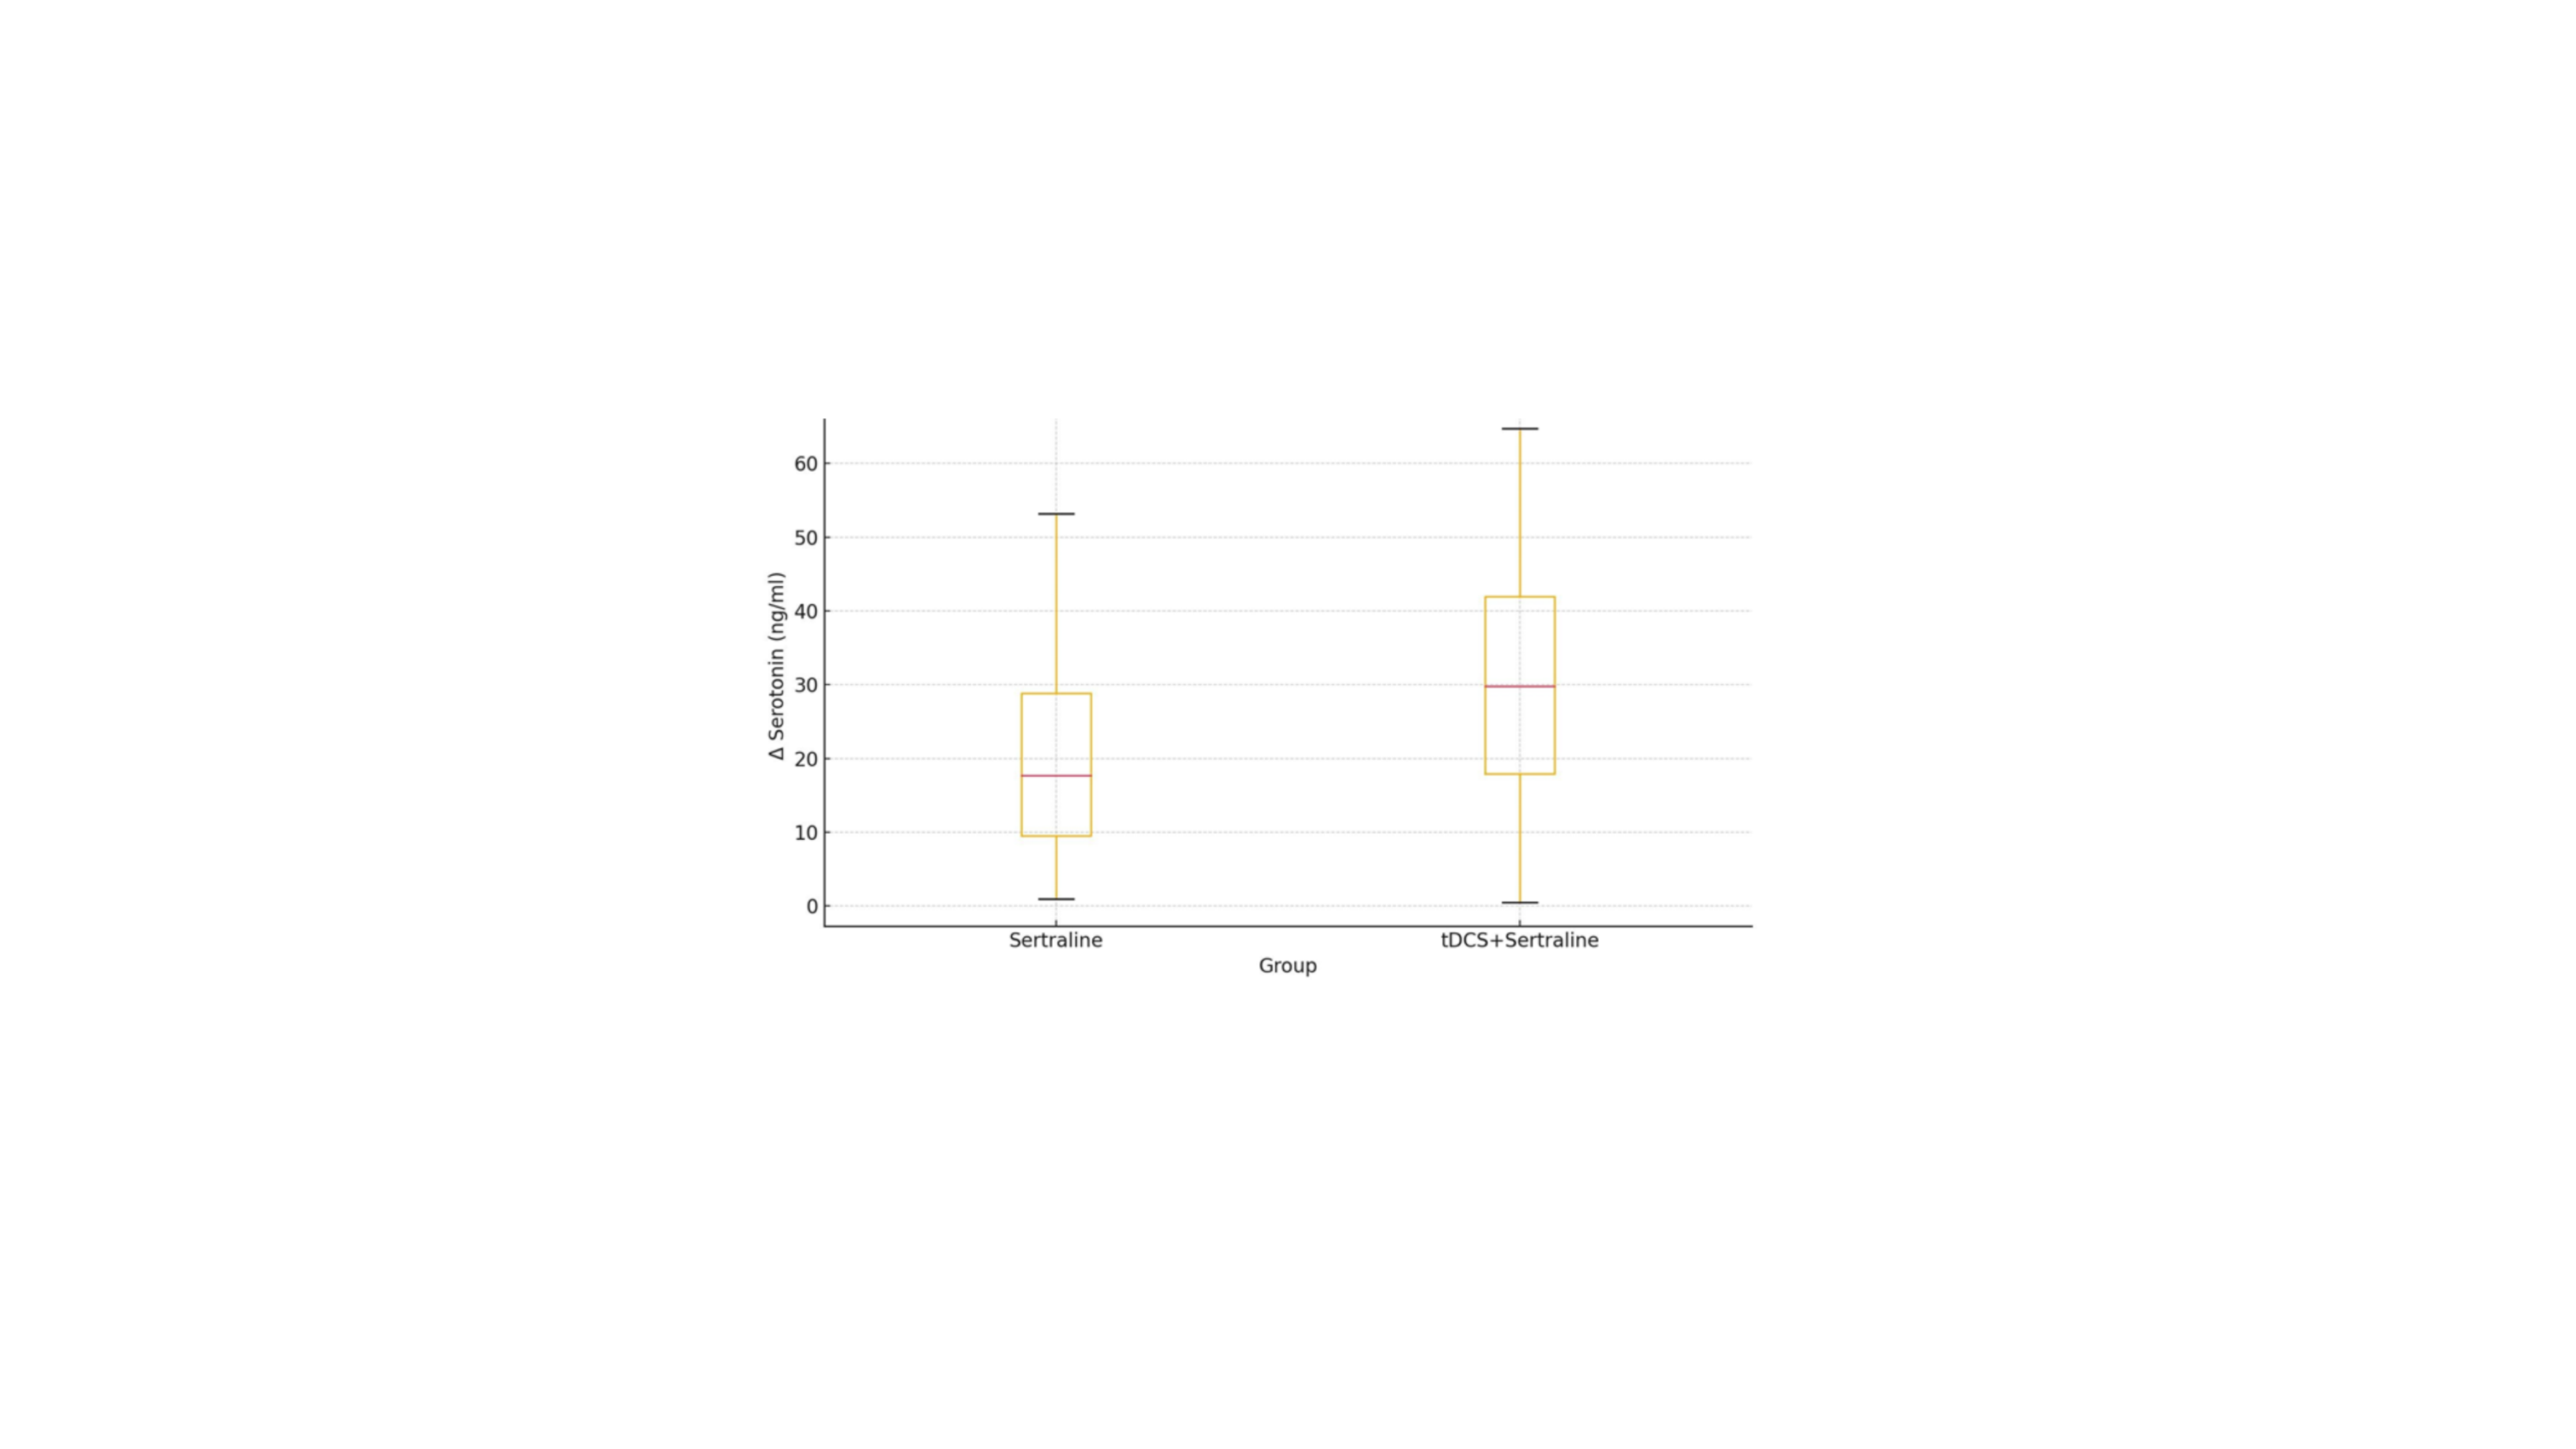
**

The combined (Sertraline + tDCS) group exhibited a greater mean increase in serum serotonin levels after treatment. Δ Serotonin represents the difference between post-treatment and baseline serum serotonin levels (Δ = post-treatment − baseline). Data are expressed as mean ± SD. Sertraline = Sertraline monotherapy; tDCS = transcranial direct current stimulation.

**Supplementary Figure 2. Levels of improvement in beck depression inventory (BDI) scores by group**

**
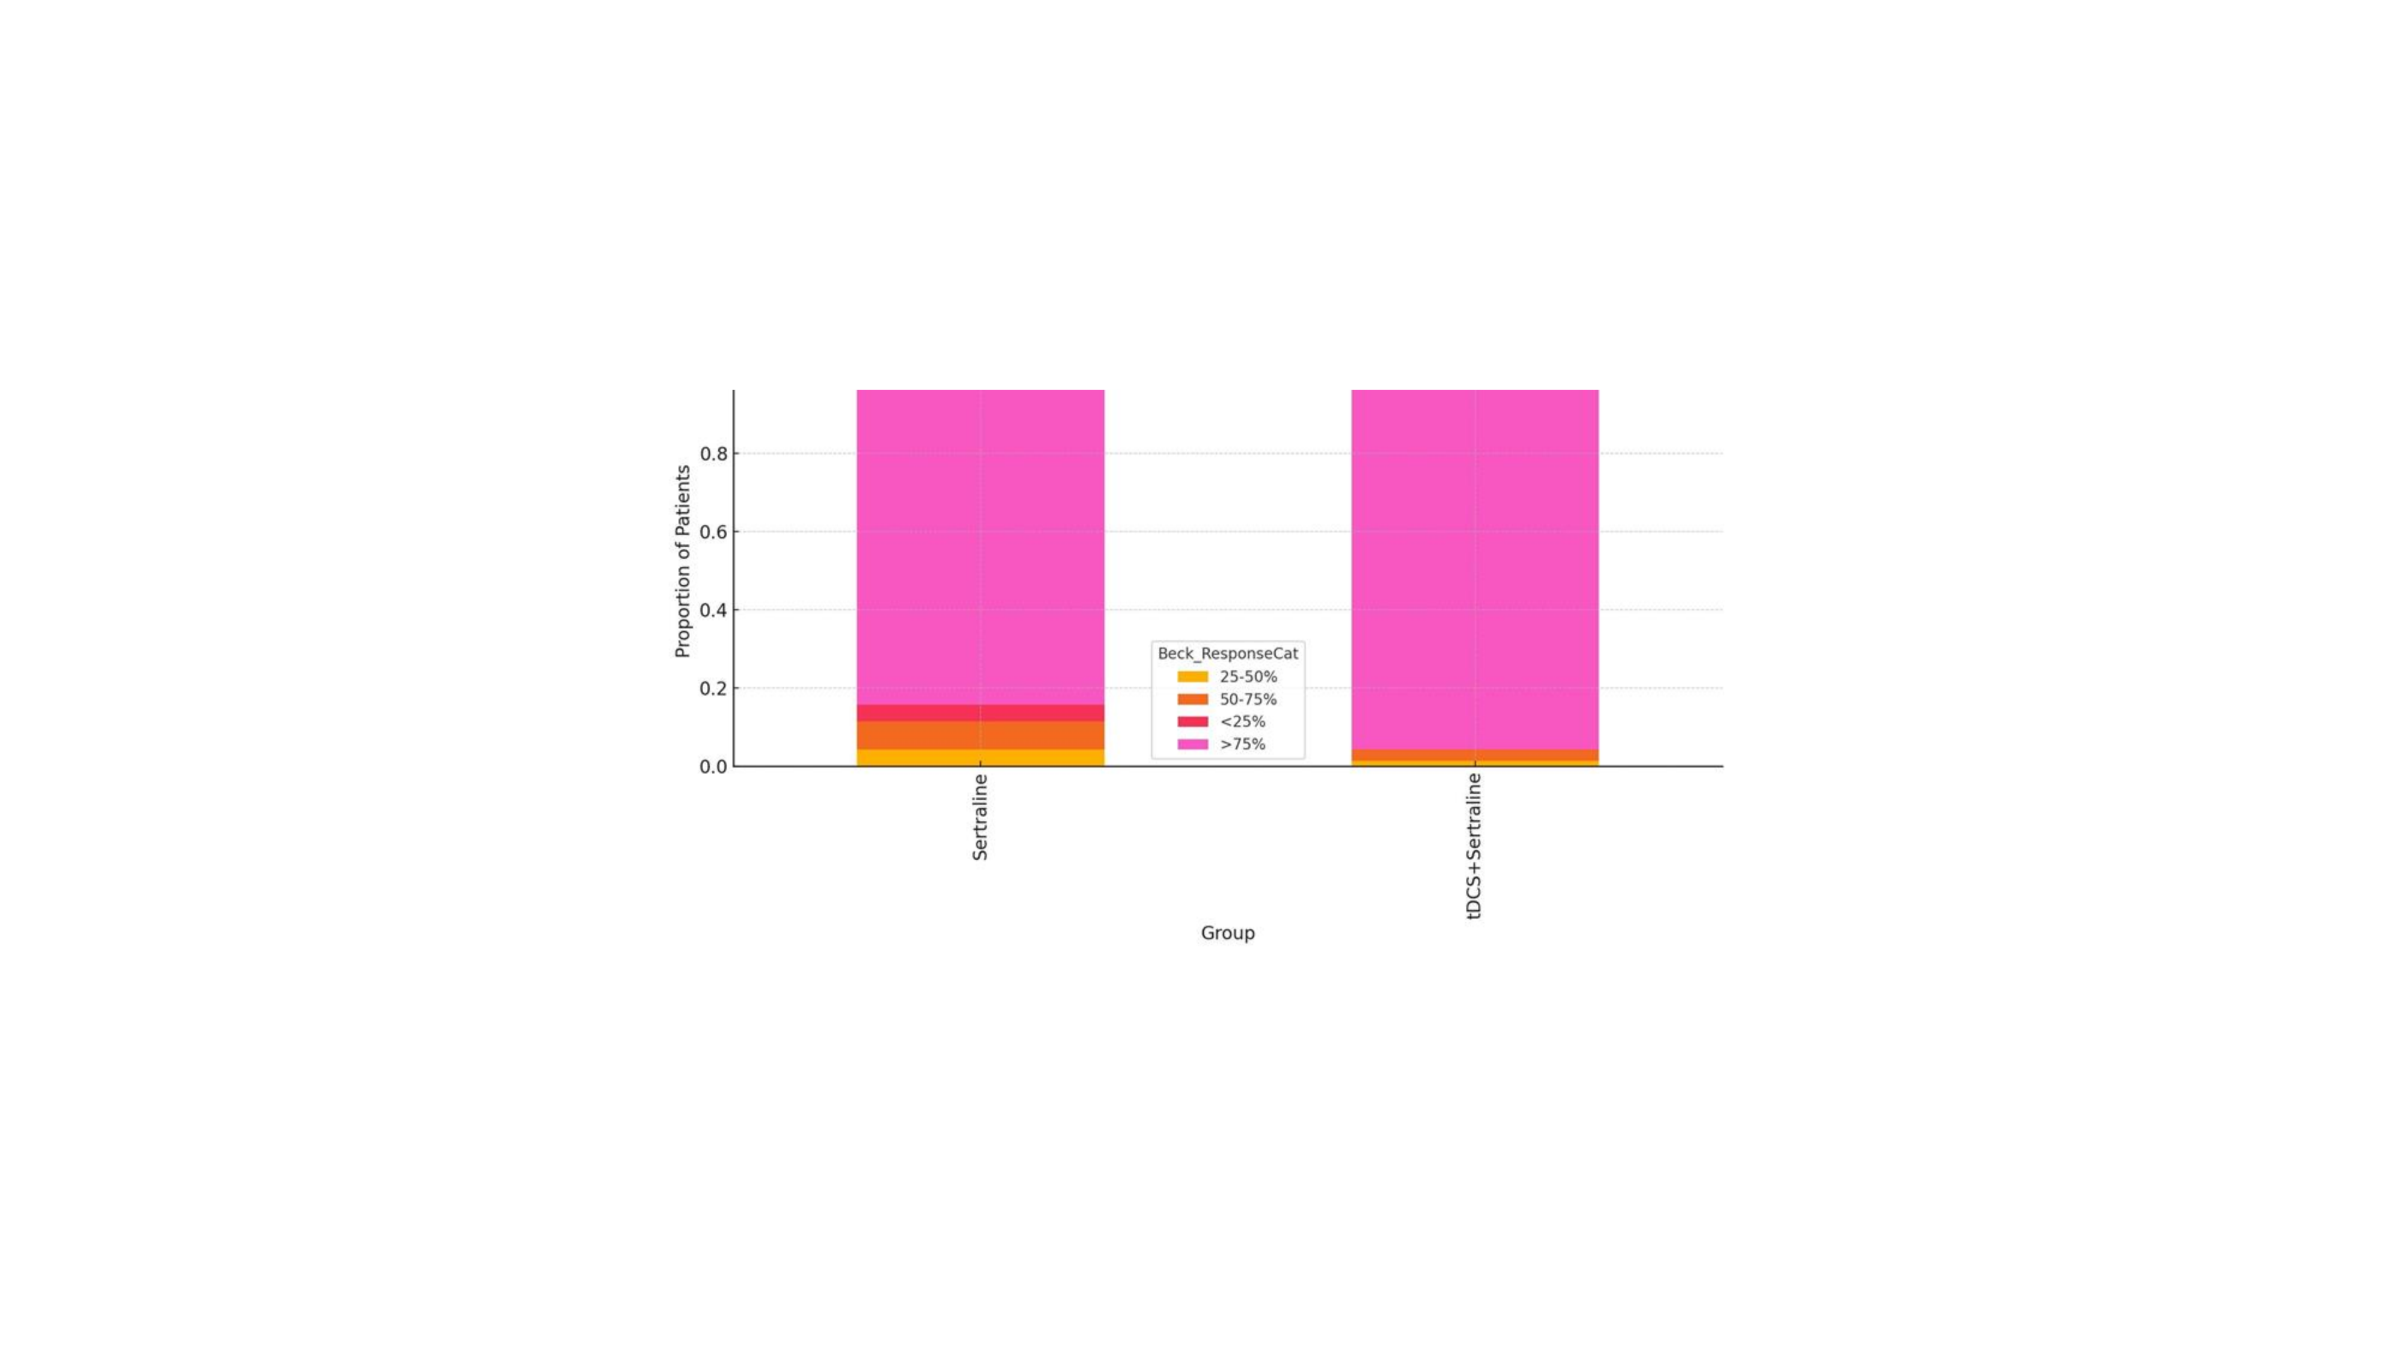
**

A greater proportion of patients in the Sertraline + tDCS group achieved >50% improvement in BDI scores. BDI – Beck Depression Inventory; tDCS – transcranial direct current stimulation.

**Supplementary Figure 3. Levels of improvement in hamilton depression rating scale (HAMD) scores by group**


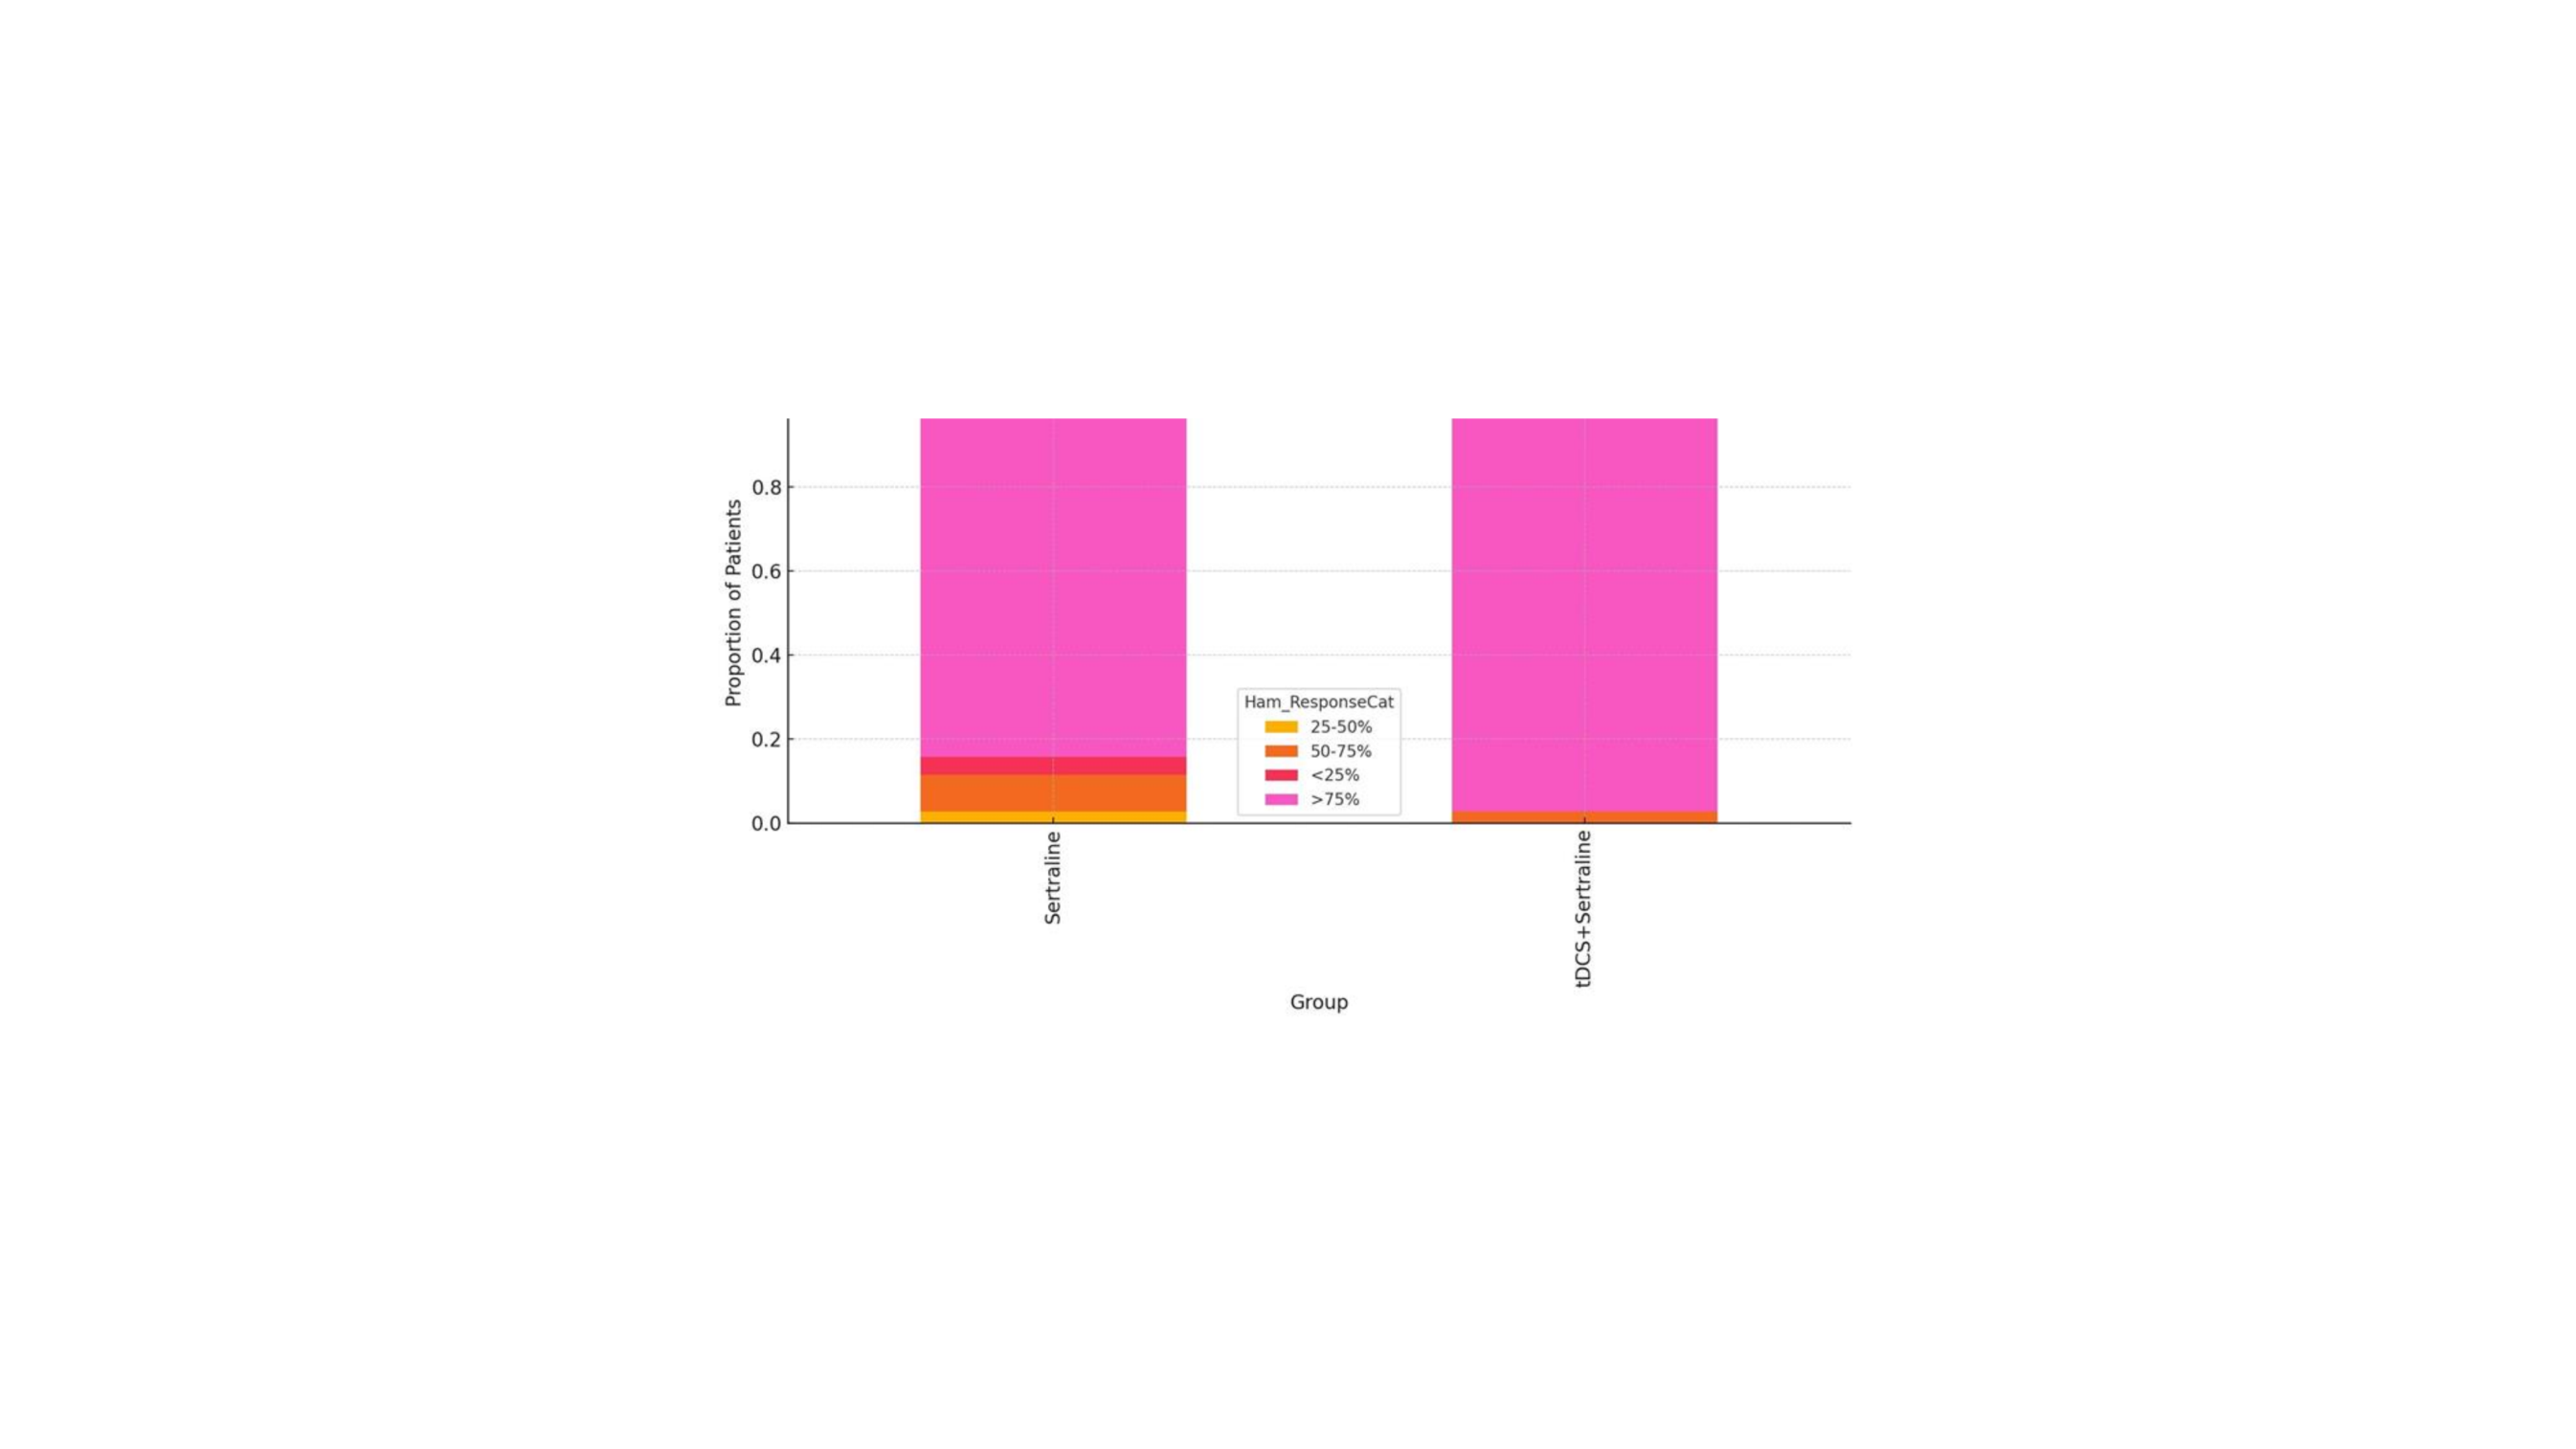


The Sertraline + tDCS group showed a higher proportion of patients with substantial (>75%) symptom reduction. HAMD – Hamilton Depression Rating Scale; tDCS – transcranial direct current stimulation.
